1 **Chemogenomic screening Identifies the Hsp70 Co-chaperone HDJ2 as**  
2 **a Hub for Anticancer Drug Resistance**

3

4

5

6

7

8 Nitika<sup>1</sup>, Jacob S. Blackman<sup>1</sup>, Laura E. Knighton<sup>1</sup>, Jade E. Takakuwa<sup>1</sup>, Stuart K.  
9 Calderwood<sup>2</sup> and Andrew W. Truman<sup>1\*</sup>

10

11 <sup>1</sup>Department of Biological Sciences, University of North Carolina Charlotte, Charlotte, NC  
12 28223, USA

13 <sup>2</sup>Department of Radiation Oncology, Beth Israel Deaconess Medical Center,  
14 Harvard Medical School, 330 Brookline Ave, Boston, MA 02215, USA

15

16 \* Correspondence: [atruman1@uncc.edu](mailto:atruman1@uncc.edu)

17

18 Running title: HDJ2 regulates anticancer drug resistance

19

20 Keywords: Hsp70, HDJ2, molecular chaperones, chemogenomic screen, anticancer drug  
21 resistance.

22

23 The authors declare no potential conflicts of interest.

24 **Abstract**

25 Heat shock protein 70 (Hsp70) is an important molecular chaperone that regulates  
26 oncoprotein stability and tumorigenesis. However, attempts to develop anti-chaperone  
27 drugs targeting molecules such as Hsp70 have been hampered by toxicity issues. Hsp70  
28 is regulated by a suite of co-chaperone molecules that bring “clients” to the primary  
29 chaperone for efficient folding. Therefore, rather than targeting Hsp70 itself, here we have  
30 examined the feasibility of inhibiting the co-chaperone HDJ2, a member of the J domain  
31 protein family, as a novel anticancer strategy. We found HDJ2 to be upregulated in a  
32 variety of cancers, suggesting a role in malignancy. To confirm this role, we screened the  
33 NIH Approved Oncology collection for chemical-genetic interactions with loss of HDJ2 in  
34 cancer. 41 compounds showed strong synergy with HDJ2 loss, whereas 18 dramatically  
35 lost potency. Several of these hits were validated using a HDJ2 inhibitor (116-9e) in  
36 castration-resistant prostate cancer cell (CRPC) and spheroid models. Taken together,  
37 these results confirmed that HDJ2 is a hub for anticancer drug resistance and that HDJ2  
38 inhibition may be a potent strategy to sensitize cancer cells to current and future  
39 therapeutics.

40

41

42

## 43 **Introduction**

44  
45 Hsp70 is a molecular chaperone that plays important roles in protein quality control  
46 processes such as protein folding, transport, degradation, regulation and aggregation  
47 prevention [1]. Hsp70 levels are elevated in various cancers and overexpression  
48 correlates with poor prognosis for survival and response to cancer therapy [2]. The  
49 elevated levels of Hsp90 and Hsp70 chaperones in cancer and their role in fostering  
50 multiple oncogenic pathways has made these proteins attractive drug targets with  
51 numerous anti-chaperone compounds having been developed so far [3]. Problematically,  
52 Hsp70 is required for cell survival and protein homeostasis, and thus its inhibition is  
53 detrimental to the viability of both normal and cancer cells, with dubious selectivity for  
54 tumor cells [4].

55 Hsp70 performs all its functions in association with a large spectrum of helper  
56 proteins known as co-chaperones that include J-proteins, tetratricopeptide repeat (TPR)  
57 domain-containing proteins and nucleotide exchange factors (NEFs) which fine-tune  
58 Hsp70 specificity and activity in the cell. The J-proteins recruit the protein substrates or  
59 clients and interact with such clients at the interface of NBD and SBD $\beta$  of Hsp70 [5]. This  
60 interaction leads to increased Hsp70-mediated ATP turnover and activation of protein  
61 folding. J-proteins have a highly conserved 70 amino acid motif containing Histidine,  
62 Proline and Aspartic acid amino acid residues known as HPD motif which is essential for  
63 stimulating ATPase activity of Hsp70 [6]. In humans, the J-protein family has about 50  
64 members which are further divided into three groups based on the localization of J domain  
65 within a protein [7, 8]. DNAJA1 (more commonly referred to as HDJ2) associates with  
66 unfolded polypeptide chains, preventing their aggregation [7]. Several Hsp70 inhibitors

67 have failed in clinical trials due to their toxicity. More recently, alternative strategies have  
68 focused on sensitizing cells to anticancer agents by either manipulating post-translational  
69 modification of chaperones or their interaction with specific co-chaperones [4, 9-19].  
70 HDJ2 (mammalian homologue of yeast Ydj1) is an interesting possible anticancer target  
71 as a key mediator of Hsp70 function that appears to regulate specific features of  
72 tumorigenesis [13, 20, 21]. A recent study demonstrated that CRPCs expressing ARv7  
73 are insensitive to Hsp90 inhibitors but are sensitive to Hsp40 inhibition [22]. In addition,  
74 we have shown that targeting specific oncoprotein complexes (ribonucleotide reductase)  
75 with a combination of traditional as well as an HDJ2 inhibitor produces highly synergistic  
76 effects [13]. We propose that targeting HDJ2 in cancer may offer an attractive alternative  
77 to the toxicity induced by full Hsp90/Hsp70 inhibition.

78 Anticancer monotherapies using broadly active cytotoxic or molecularly targeted  
79 drugs are limited in their ability to demonstrate a reliable clinical response. This is due to  
80 redundant signaling pathways, feedback loops and resistance mechanisms in the cancer  
81 cells [23, 24]. Thus, combination anticancer therapies have been used clinically for over  
82 50 years to improve the responses achieved by monotherapies alone. Cancer cell line-  
83 based models for these combination therapies are easy and inexpensive to perform using  
84 high-throughput drug screening protocols (HTS) to identify the most effective drug  
85 combination [25, 26]. HTS helps to explore the relation between the cell line  
86 characteristics and drug specific dose responses [25]. Chemogenomics is one such HTS  
87 based approach where large collection of anticancer chemical drugs are screened to  
88 identify biological targets. These screening sets often contain small molecules that are  
89 well annotated and have defined molecular targets. Such an approach is particularly

90 beneficial for cancer research because malignant cells often contain multiple aberrations  
91 which require targeted therapy to inactivate cancer driver activities and mitigate  
92 deleterious effects of the drugs to normal cells [24, 27].

93 Here, we performed an unbiased screen of the NIH Approved Oncology Drug set  
94 containing 131 anti-cancer drugs in combination with HAP1 cancer cell lines depleted of  
95 J-protein HDJ2. We identified 41 compounds showing strong synergy with the loss of  
96 HDJ2, and by contrast 18 molecules displaying reduced potency in the knockout cell line.  
97 We validated three drugs (cabozantinib, clofarabine and vinblastine) in combination with  
98 a unique HDJ2 inhibitor (116-9e) for synergy in the LNCaP cancer cell lines and confirmed  
99 omacetaxine mepesuccinate, idarubicin and sorafenib for antagonism (i.e. with reduced  
100 potency after HDJ2 inhibition). This study demonstrates the validity of developing Hsp70  
101 co-chaperone inhibitors to sensitize cells to current anticancer therapies and suggests  
102 that determining HDJ2 status of a tumor may be beneficial in selecting the most  
103 appropriate course of treatment.

104

## 105 **Materials and Methods**

106 **Cell culture.** The HAP1 Chronic Myelogenous Leukemia cancer cell line and HDJ2  
107 Knockout cell line was purchased from Horizon Discovery and were cultured in Iscove's  
108 Modified Eagle Medium (Invitrogen) with 10% fetal bovine serum (Gibco), 100 units/ml  
109 penicillin, and 100 µg/ml streptomycin at 5% CO<sub>2</sub> and 37° C. The LNCaP cancer cell line  
110 was purchased from ATCC and were cultured in RPMI-1640 medium (Invitrogen) with  
111 10% fetal bovine serum (FBS, Clontech), 100 units/ml penicillin, and 100 µg/ml  
112 streptomycin at 5% CO<sub>2</sub> and 37° C.

113 **Drug Screening.** Approved Oncology Drug plates consisting of the most current FDA  
114 approved anticancer drugs were obtained from National Cancer Institute (NCI). For  
115 experiments delineating the synergy between the loss of HDJ2 and approved anticancer  
116 drug, HAP1 cells and HAP1 (HDJ2 KO) cells were plated in growth media at 20%  
117 confluency 1 day prior to drug treatment. On Day 1 of treatment, cells were treated with  
118 DMSO (control), Approved oncology anticancer drugs at 50  $\mu$ M for 72 hours. Following  
119 drug treatments, Cell Titer-Glo reagent was added directly to the wells according to  
120 manufacturer's instructions. The luminescence was measured on Bio-Tek Plate reader.  
121 Luminescence reading was normalized to and expressed as a relative percentage of the  
122 plate averaged DMSO control. The data shown are the mean and SEM of three  
123 independent biological replicates.

124 **Combination index (CI) calculations.** For IC<sub>50</sub> calculations, LNCaP cells were seeded  
125 in triplicates in 96-well white bottom Nunc plates in growth media at 20% confluency 1 day  
126 prior to initiation of drug treatment. On Day 1 of treatment, cells were treated with DMSO  
127 (control) and ten folds serial dilution of anti-cancer drugs Cabozantinib, Clofarabine,  
128 Vinblastine, Sorafenib, Idarubicin and Omacetaxine mepesuccinate and 116-9e. After  
129 72 h, cell viability was measured using Promega Cell Titer-Glo cell viability assay on Bio-  
130 Tek plate reader. The combination index was calculated using the Chou-Talalay method  
131 using CompuSyn software[28].

132 **Spheroid Generation.** Single-cell suspensions (5000/well) were plated in one well of 24-  
133 well plates in a 1:1 mixture of RPMI medium and Matrigel (BD Bioscience CB-40324).  
134 Cells in Matrigel are kept cold at all times and under continuous agitation. Warm PBS is  
135 added to all empty wells, if any. Plates are incubated at 37 °C with 5% CO<sub>2</sub> for 15 min to

136 solidify the gel before addition of 100  $\mu$ l of pre-warmed RPMI to each well. Two days after  
137 seeding, medium is fully removed and replaced with fresh RPMI containing the indicated  
138 drugs. The same procedure is repeated daily on two consecutive days. Twenty-four hours  
139 after the last treatments, media is removed and wells are washed with 100  $\mu$ l of pre-  
140 warmed PBS. To prepare for downstream assays, spheroids are then released from  
141 Matrigel by incubating at 37 °C for 40 min in 100  $\mu$ l of 10 mg/mL dispase (Sigma).

142 **Apoptosis assay.** Apoptosis of LNCaP spheroids was detected by the Annexin V–  
143 FITC/propidium iodide–binding assay. Cells were treated with either 0.1% DMSO  
144 (dimethyl sulfoxide), 116-9e, Cabozantinib, Clofarabine, Vinblastine, Sorafenib,  
145 Idarubicin, Omacetaxine mepesuccinate and Sorafenib alone or in combination with 116-  
146 9e for 48 hours at the IC<sub>50</sub> concentrations, and then stained with Annexin V–FITC and  
147 propidium iodide. The rate of apoptosis was determined using BD FORTESSA, and data  
148 were analyzed using FlowJo software and were reported as the mean  $\pm$  SD. The results  
149 are representative of three independent experiments.

150 **Bioinformatics.** Cancer genome data and Cancer Cell Line Encyclopedia data were  
151 accessed from the cBioPortal ([www.cbioportal.org](http://www.cbioportal.org)) for Cancer Genomics (Gao et al,  
152 2013). Total patient numbers and detailed information regarding published datasets and  
153 associated publications are indicated in Fig 1A and 1B.

154 **Statistical analysis.** Data were analyzed using GraphPad Prism built-in statistical tests  
155 indicated in relevant figure legends. The following asterisk system for P value was used:  
156 P <0.05; P <0.01; 0.001; and P <0.0001.

## 157 **Results**

158 **HDJ2 is mutated and overexpressed in a variety of cancers.**

159 We first investigated the incidence of HDJ2 alterations in cancer using cancer genomics  
160 databases. Mutations and copy number changes occur in HDJ2 at a relatively low level  
161 (<5% of samples) in the majority of cancer types (Figure 1). However, the data shows  
162 that HDJ2 is strikingly amplified in neuroendocrine prostate cancer (NEPC) at a frequency  
163 of 18.42% (Figure 1A). Additionally, HDJ2 is mutated in 11.1% of Non-Small Cell Lung  
164 Cancer (NSCLC) cases (Figure 1A). Hsp70 and Hsp90 are often overexpressed in tumors  
165 [2, 29, 30]. To determine if the HDJ2 gene is also overexpressed in cancer, we analyzed  
166 the expression data from 72,175 samples in 236 studies (cBioportal database) [31, 32].  
167 Interestingly, HDJ2 was expressed at significantly higher levels in cancer samples, with  
168 a median expression in cancer of between log<sub>2</sub> values of 10 and 14 (Figure 1B). Taken  
169 together, these data suggest that alteration of HDJ2 function may be important in the  
170 malignant properties of cancer cells.

171

### 172 **Characterizing the role of HDJ2 in anticancer drug resistance.**

173 The existing literature is contradictory as to whether HDJ2 may possess tumor suppressor  
174 or driver properties [21, 33]. To clarify whether silencing of HDJ2 could be beneficial in the  
175 treatment of cancer, we screened wildtype HAP1 cells and HAP1 cells lacking HDJ2  
176 (HAP1<sup>HDJ2 KO</sup>) for comparative resistance against the NIH NCI Approved Oncology  
177 Collection (Figure 2A)  
178 ([https://dtp.cancer.gov/organization/dscb/obtaining/available\\_plates.html](https://dtp.cancer.gov/organization/dscb/obtaining/available_plates.html)). According to  
179 pharmacologic action, the compounds in the library have been divided into seven  
180 categories: Protein synthesis inhibitors, Proteasome inhibitors, Epigenetic modifiers,  
181 Metabolic inhibitors, Cytoskeletal inhibitors, Signal transduction inhibitors and DNA



182 synthesis and repair inhibitors. Further fold enrichment of each drug category was  
183 calculated for the drugs whose potency increased or decreased with HDJ2 KO. To  
184 monitor the screening quality, each screening plate contained control wells treated with  
185 vehicle (1% DMSO). The final concentration of the screening compounds was 50  $\mu\text{mol/L}$ .  
186 Positive hits (synergistic) or negative hits (antagonistic) were determined by normalizing  
187 the  $\log_2$  ratio of viability of HDJ2 knockout cells over wildtype cells. A full list of the  
188 screening results is shown in Supplementary Table T1 and the sorted data are graphically  
189 plotted in Figure 2B. 41 drugs had increased potency upon HDJ2 deletion whereas 18  
190 drugs displayed reduced potency. Drug target analysis was carried out by calculating fold  
191 enrichment of positive hits (synergistic) or negative hits (antagonistic) over the total  
192 number of drugs in that category. Drug target analysis of the synergistic drug hits revealed  
193 significant enrichment in DNA synthesis and repair inhibitors, epigenetic modifiers, signal  
194 transduction and cytoskeletal inhibitors (Figure 2C). In contrast, drug target analysis of  
195 antagonistic drug hits revealed a higher enrichment in categories such as epigenetic  
196 modifiers, protein synthesis inhibitors, cytoskeletal inhibitors and proteasome inhibitors  
197 (Figure 2D).

198 Strikingly, compounds from different categories showed dissimilar distribution of  $\log_2$  ratio  
199 of viability, implying that different pharmacologic mechanisms probably underlie the HDJ2  
200 inhibitory capacity. Category no. 6 (Signal Transduction inhibitors) contained the most  
201 hits which were synergistic with HDJ2 loss. Loss of HDJ2 also substantially increased the  
202 potency of DNA synthesis and repair (DDR) inhibitors. These results are in agreement  
203 with our previous study showing that HDJ2 plays an important role in maintaining the

204 stability of ribonucleotide reductase (RNR) complex which is important for DNA synthesis  
205 [13].

206

207 **Validation of anticancer drugs significantly altered for potency upon loss of HDJ2.**

208 Many anticancer compounds have low potency, poor therapeutic index or suffer from  
209 development of resistance [34]. Monotherapy is rarely efficient and instead drug cocktails  
210 are widely used in the clinic [23, 26]. Establishing these combinations can enhance the  
211 scope of preclinical studies and inform the design of future clinical trials. Although several  
212 compounds were identified as becoming significantly more potent in cells lacking HDJ2,  
213 it remained to be determined whether small molecule inhibition of HDJ2 could produce a  
214 similar result. Our previous bioinformatics analysis indicated that a large proportion of  
215 prostate cancer cells contain either amplification or mutation of HDJ2 (approximately  
216 18%, see Figure 1). Therefore, we next analyzed the effect of treating prostate cancer  
217 cells (LNCaP) with a combination of 116-9e, a small molecule inhibitor of HDJ2 [35] and  
218 interesting hits from our screen. We decided to focus on three synergistic drugs  
219 discovered in the screen: cabozantinib (receptor tyrosine kinase inhibitor), clofarabine (an  
220 RNR inhibitor) [36] and vinblastine (microtubule inhibitor/G2 arresting agent) [37-40]. We  
221 also validated three drugs that demonstrated a significant loss of potency in cells lacking  
222 HDJ2: sorafenib (a VEGFR-2 inhibitor) [41], omacetaxine mepesuccinate (more  
223 commonly known as homoharringtonine, a protein translation inhibitor) [42] and idarubicin  
224 (topoisomerase II inhibitor) [43]. To determine synergy in a quantitative manner, we  
225 calculated drug synergy (Combination Index values, CI) between 116-9e and either  
226 synergistic or antagonistic drugs hits across a broad range of concentrations using the

227 Chou-Talalay method [44]. For three hits identified in our screen (cabozantinib,  
228 clofarabine and vinblastine) we confirmed significant synergy ( $CI < 1$ ) with 116-9e across  
229 a range of doses (Figure 3A, B & C). In contrast, idarubicin, omacetaxine and sorafenib  
230 displayed a significantly antagonistic interaction ( $CI > 1$ ) across a range of doses (Figure  
231 3D, E & F).

232 These data suggest that while HDJ2 inhibition is a promising strategy to sensitize cells to  
233 some inhibitors, it might have inverse effects with other inhibitors.

234

### 235 **Evaluating the effects of dual targeting of identified drugs with HDJ2 inhibition on** 236 **morphology and viability of prostate cancer spheroids.**

237 Recent studies have suggested that precision therapy approaches involving the exposure  
238 of drugs directly to the primary tumor tissue have the potential to augment the  
239 personalized medicine efforts and influence clinical decisions [45, 46]. Establishing *ex*  
240 *vivo* three-dimensional (3D) tumor spheroids or organoids derived from primary cancers  
241 can be easily established and potentially scaled to screen drug combinations [47]. These  
242 3D cancer models appear to recapitulate features of the tumor of origin in terms of  
243 heterogeneity, cell differentiation, histoarchitecture, and clinical drug response and can  
244 be used for rapid drug screening [48]. We therefore next examined the effect of drug  
245 combination (three antagonistic and synergistic hits) on LNCaP spheroids. Specifically,  
246 changes in spheroid size and shape induced by the 3 antagonistic and synergistic drugs  
247 were determined. Visual examination revealed that for the synergistic drugs combination  
248 with 116-9e resulted in physical disruption of LNCaP spheroids, resulting in decrease in  
249 apparent spheroid size (Figure 4A). The disruption started on the second day of the

250 treatment. However, when the 3 antagonistic drugs were administered along with 116-  
251 9e, there were minimal changes in spheroid morphology indicating that the combination  
252 was ineffective.

253 Next, we measured the induction of apoptosis in the spheroids post drug treatments. We  
254 determined the kinetics of apoptosis induction using AnnexinV/PI staining. Drug-induced  
255 apoptosis was readily detected in the LNCaP spheroids treated with mono and dual drug  
256 combinations. In concurrence with the previous results, the combination of the three  
257 synergistic drugs with 116-9e displayed enhanced apoptosis as compared to the single  
258 drug treatment whereas spheroids treated with the 3 antagonistic drugs showed little or  
259 no difference in the rate of apoptosis as compared to the dual drug combination with 116-  
260 9e (Figure 4B).

261

## 262 **DISCUSSION**

263 Although inhibitors of Hsp70 and Hsp90 have been developed for research purposes,  
264 conversion of these molecules for use in patient treatment have been hampered by  
265 toxicity issues [4]. We undertook this study to resolve conflicting literature on whether  
266 inhibiting HDJ2, a co-chaperone of Hsp70 may be useful as a novel anticancer strategy.  
267 Our bioinformatic analysis of HDJ2 expression and mutation clearly identify HDJ2 as  
268 being highly altered in a range of cancers, particularly in Prostate Cancer. This data in  
269 conjunction with a recent finding that Hsp40 is involved in functional regulation of ARV  
270 [22] makes HDJ2 inhibition an ideal choice as a novel therapeutic target in Prostate  
271 Cancer.

272 Chemogenomic screening of knockout cell lines produces both useful mechanistic and  
273 translational understanding of protein function. In this study, loss of HDJ2 increased the  
274 potency of a substantial number (31%) of clinically used anticancer drugs.

275 Hsp70 activates many proteins involved in the DNA damage response and DNA  
276 repair pathways (DDR). These include ATM, APE1, PARP1, XRCC1, LIG3, MSH2, MLH1  
277 and Apollo [49-51]. In addition, studies from our group have established roles for both  
278 Hsp70 and HDJ2 in stability of the RNR complex [13, 50, 52]. As such, we would expect  
279 a high degree of synergy between loss of HDJ2 function and the DNA damage  
280 response/repair pathways. Correspondingly, around 20 commonly used anticancer DNA  
281 damage and Repair (DDR) inhibitors were found to be synergistic with loss of HDJ2.  
282 These included 5-fluorouracil (5-FU) and premetrexed, widely used anticancer drugs  
283 whose metabolites are incorporated into both DNA and RNA in addition to inhibiting  
284 thymidylate synthase [53]. Here we validated synergy with the RNR inhibitor clofarabine.  
285 Clofarabine is phosphorylated intracellularly to form cytotoxic active 5'-triphosphate  
286 metabolite, which inhibits the enzymatic activities of RNR and DNA polymerase, resulting  
287 in inhibition of DNA synthesis and repair[54]. In addition, we also identified PARP  
288 inhibitors olaparib and niraparib and the topoisomerase inhibitors etoposide, teniposide,  
289 valrubicin and dexrazoxane to have increased potency in our screen.

290 While most DDR inhibitors displayed increased potency with HDJ2 depletion, four  
291 of them were antagonistic to loss of HDJ2. These include topoisomerase inhibitors and  
292 nucleic acid synthesis inhibitors such as trifluridine, irinotecan, epirubicin (4'-epi-isomer  
293 of the antibiotic doxorubicin) and idarubicin (4-demethoxy analogue of daunorubicin)[55].  
294 While at first these results seem paradoxical, it is worth noting that irinotecan is a type I

295 topoisomerase inhibitor, whereas Etoposide inhibits the type II class. It may be that Hsp70  
296 and HDJ2 play different regulatory roles in the stabilization and activation of these related  
297 proteins. It should be noted that both idarubicin and epirubicin trigger TOPII-mediated  
298 DNA cleavage. The effects of these molecules may be prevented if HDJ2 alters the  
299 function of TOPII.

300 In addition to DDR, HDJ2 is also involved in signal transduction, with previous reports  
301 indicating that the yeast homologue of HDJ2 (Ydj1) is critical for supporting the integrity  
302 of kinase signaling networks [56]. HDJ2 is mobilized to specific sites within the nucleus in  
303 response to inappropriate targeting or folding of specific mutant receptors. HDJ2  
304 overexpression ameliorates defective transactivation and trans repression activity of  
305 mutant Glucocorticoid receptors [57]. In line with the previous studies, we found that a  
306 handful of Receptor Tyrosine kinase inhibitors were synergistic with HDJ2 depletion.  
307 These included Vascular endothelial growth factor receptor (VEGFR) inhibitors such as  
308 sunitinib, cabozantinib, lenvatinib and pazopanib. Interestingly, randomized phase III  
309 clinical trials are being conducted to validate the efficacy of Cabozantinib in heavily  
310 pretreated prostate cancer patients [58]. One implication from our study is that HDJ2  
311 inhibition might significantly enhance the effect of cabozantinib monotherapy.

312 Strikingly, some of the kinase inhibitors were antagonistic to HDJ2 depletion. These  
313 include VEGFR inhibitors such as regorafenib and sorafenib. This disparity can be  
314 explained by the different target receptors and mechanisms of action of these drugs.  
315 Interestingly, recent studies indicated that these small molecule inhibitors exhibit off-  
316 target effects. Some of these drugs are misidentified and mischaracterized for their target

317 specific inhibition, which has contributed to the high failure rate of these drugs in treatment  
318 of cancer patients [59].

319 Other than its role in signal transduction, HDJ2 is also important for maintaining the  
320 cellular cytoskeleton. Previous studies have suggested that YDJ1 (yeast homolog of  
321 HDJ2) is important for the proper assembly of microtubules [60, 61]. Another report  
322 showed that HDJ2 depletion causes relocation of N-cadherin and enhanced activity of  
323 metalloproteinases. This leads to changes in the actin cytoskeleton indicating that HDJ2  
324 is important for prevention of the amoeboid-like transition of tumor cells [62]. These  
325 studies indicated the involvement of HDJ2 in maintaining cytoskeletal organization. We  
326 found 3 anticancer drugs targeting the cytoskeleton to be synergistic with HDJ2 depletion,  
327 including vinblastine sulfate (cytoskeletal inhibitor that disrupts microtubule formation  
328 during mitosis and interferes with glutamic acid metabolism), estramustine (binds to  
329 microtubule-associated proteins (MAPs) and inhibits microtubule dynamics) and  
330 ixabepilone (promotes tubulin polymerization and microtubule stabilization, thereby  
331 arresting cells in the G2-M phase [63]).

332 Strikingly, two of the tubulin inhibitors were found to be antagonistic to HDJ2 depletion.  
333 These include paclitaxel and ixabepilone. Paclitaxel inhibits the disassembly of  
334 microtubules resulting in the inhibition of cell division whereas Ixabepilone promotes  
335 tubulin polymerization and microtubule stabilization, arresting cells in the G2-M phase of  
336 the cell cycle [63]. This discrepancy again implies that these cytoskeletal inhibitors might  
337 have off target effects due to their mischaracterization [59].

338 Epigenetic modifying drugs display substantially modified potency depending on cellular  
339 HDJ2 status. While previous studies have indicated the association between proteomic

340 changes and histone PTMs in response to Hsp90 inhibitor treatment in bladder carcinoma  
341 cells, no such association has been shown for HDJ2 and Histone PTMs [64]. Interestingly,  
342 vorinostat was the only drug that was synergistic to HDJ2 inhibition. It is a histone  
343 deacetylase inhibitor that binds to the catalytic domain of the histone deacetylases  
344 (HDACs) [65]. However, we identified two histone deacetylase inhibitor drugs to be  
345 antagonistic to HDJ2 depletion: panobinostat and romidepsin inhibit histone deacetylase  
346 (HDAC), inducing hyperacetylation of core histone proteins, which may result in  
347 modulation of cell cycle protein expression, cell cycle arrest in the G2/M phase and  
348 apoptosis [66]. This is the first study that indicates an association between histone PTMs  
349 and HDJ2. While these findings require further investigation, it is possible that HDJ2  
350 regulates histone properties. Interestingly, both of the protein synthesis inhibitors  
351 (bortezomib and omacetaxine) in our screen were antagonistic to HDJ2 depletion [67].  
352 We confirmed that omacetaxine (protein biosynthesis inhibitor) displayed reduced  
353 potency upon inhibition of HDJ2 [42].

354 Several important conclusions can be inferred from the data presented here. Firstly, our  
355 HTS screening method might be useful in the selection of drugs for individual patients in  
356 future studies, since the drug sensitivity of cancer cells is dependent on HDJ2 expression.  
357 For example, compounds that belong to the same category such as sunitinib and  
358 sorafenib may behave differently upon HDJ2 deletion.

359 Finally, in addition to intra-pathway synergistic combinations (VEGFRi, MAPKi pathway  
360 inhibitors, and DNA damage/cell-cycle checkpoint pathway combinations), which is  
361 consistent with a wealth of publications demonstrating intrapathway synergy [68, 69], we  
362 also discovered novel inter-pathway combinations of HDJ2. This study describes



363 promising results and indicates an integrative approach based on HTS which has  
364 potential to govern cancer patient treatment by combination therapy. Taken together, this  
365 study suggests a potential Precision Medicine approach that has the potential to inform  
366 anticancer strategy based on patient HDJ2 status.

367

## 368 **Acknowledgements**

369 The authors thank NIH for providing materials used in this study and J. Gestwicki, D.  
370 Dreau and T. Erick for helpful comments. This project was supported by NCI  
371 R15CA208773 and Grant-In-Aid of Research from Sigma Xi (G2018031591887158), The  
372 Scientific Research Society.

373

## 374 **References**

- 375 1. Rosenzweig R, Nillegoda NB, Mayer MP, Bukau B. The Hsp70 chaperone network. *Nat*  
376 *Rev Mol Cell Biol.* 2019. Epub 2019/06/30. doi: 10.1038/s41580-019-0133-3. PubMed PMID:  
377 31253954.
- 378 2. Ciocca DR, Calderwood SK. Heat shock proteins in cancer: diagnostic, prognostic,  
379 predictive, and treatment implications. *Cell Stress Chaperones.* 2005;10(2):86-103. Epub  
380 2005/07/26. doi: 10.1379/csc-99r.1. PubMed PMID: 16038406; PubMed Central PMCID:  
381 PMCPMC1176476.
- 382 3. Gestwicki JE, Shao H. Inhibitors and chemical probes for molecular chaperone networks.  
383 *J Biol Chem.* 2019;294(6):2151-61. Epub 2018/09/15. doi: 10.1074/jbc.TM118.002813. PubMed  
384 PMID: 30213856; PubMed Central PMCID: PMCPMC6369302.
- 385 4. Evans CG, Chang L, Gestwicki JE. Heat shock protein 70 (hsp70) as an emerging drug  
386 target. *J Med Chem.* 2010;53(12):4585-602. Epub 2010/03/26. doi: 10.1021/jm100054f. PubMed  
387 PMID: 20334364; PubMed Central PMCID: PMCPMC2895966.
- 388 5. Bertelsen EB, Chang L, Gestwicki JE, Zuiderweg ER. Solution conformation of wild-type  
389 *E. coli* Hsp70 (DnaK) chaperone complexed with ADP and substrate. *Proc Natl Acad Sci U S A.*  
390 2009;106(21):8471-6. Epub 2009/05/15. doi: 10.1073/pnas.0903503106. PubMed PMID:  
391 19439666; PubMed Central PMCID: PMCPMC2689011.
- 392 6. Kampinga HH, Craig EA. The HSP70 chaperone machinery: J proteins as drivers of  
393 functional specificity. *Nat Rev Mol Cell Biol.* 2010;11(8):579-92. Epub 2010/07/24. doi:  
394 10.1038/nrm2941. PubMed PMID: 20651708; PubMed Central PMCID: PMCPMC3003299.
- 395 7. Craig EA, Marszalek J. How Do J-Proteins Get Hsp70 to Do So Many Different Things?  
396 *Trends Biochem Sci.* 2017;42(5):355-68. Epub 2017/03/21. doi: 10.1016/j.tibs.2017.02.007.  
397 PubMed PMID: 28314505; PubMed Central PMCID: PMCPMC5409888.

- 398 8. Hageman J, van Waarde MA, Zylicz A, Walerych D, Kampinga HH. The diverse members  
399 of the mammalian HSP70 machine show distinct chaperone-like activities. *Biochem J.*  
400 2011;435(1):127-42. Epub 2011/01/15. doi: 10.1042/BJ20101247. PubMed PMID: 21231916.
- 401 9. Assimon VA, Gillies AT, Rauch JN, Gestwicki JE. Hsp70 protein complexes as drug  
402 targets. *Curr Pharm Des.* 2013;19(3):404-17. Epub 2012/08/28. doi:  
403 10.2174/138161213804143699. PubMed PMID: 22920901; PubMed Central PMCID:  
404 PMCPMC3593251.
- 405 10. Walton-Diaz A, Khan S, Bourboulia D, Trepel JB, Neckers L, Mollapour M. Contributions  
406 of co-chaperones and post-translational modifications towards Hsp90 drug sensitivity. *Future Med*  
407 *Chem.* 2013;5(9):1059-71. Epub 2013/06/06. doi: 10.4155/fmc.13.88. PubMed PMID: 23734688.
- 408 11. Taylor IR, Duniak BM, Komiyama T, Shao H, Ran X, Assimon VA, et al. High-throughput  
409 screen for inhibitors of protein-protein interactions in a reconstituted heat shock protein 70  
410 (Hsp70) complex. *J Biol Chem.* 2018;293(11):4014-25. Epub 2018/02/08. doi:  
411 10.1074/jbc.RA117.001575. PubMed PMID: 29414793; PubMed Central PMCID:  
412 PMCPMC5857975.
- 413 12. Nitika, Truman AW. Cracking the Chaperone Code: Cellular Roles for Hsp70  
414 Phosphorylation. *Trends Biochem Sci.* 2017;42(12):932-5. Epub 2017/11/06. doi:  
415 10.1016/j.tibs.2017.10.002. PubMed PMID: 29102083; PubMed Central PMCID:  
416 PMCPMC5701876.
- 417 13. Sluder IT, Nitika, Knighton LE, Truman AW. The Hsp70 co-chaperone Ydj1/HDJ2  
418 regulates ribonucleotide reductase activity. *PLoS Genet.* 2018;14(11):e1007462. Epub  
419 2018/11/20. doi: 10.1371/journal.pgen.1007462. PubMed PMID: 30452489; PubMed Central  
420 PMCID: PMCPMC6277125.
- 421 14. Truman AW, Kristjansdottir K, Wolfgeher D, Hasin N, Polier S, Zhang H, et al. CDK-  
422 dependent Hsp70 Phosphorylation controls G1 cyclin abundance and cell-cycle progression. *Cell.*  
423 2012;151(6):1308-18. Epub 2012/12/12. doi: 10.1016/j.cell.2012.10.051. PubMed PMID:  
424 23217712; PubMed Central PMCID: PMCPMC3778871.
- 425 15. Woodford MR, Dunn DM, Blanden AR, Capriotti D, Loiselle D, Prodromou C, et al. The  
426 FNIP co-chaperones decelerate the Hsp90 chaperone cycle and enhance drug binding. *Nat*  
427 *Commun.* 2016;7:12037. Epub 2016/06/30. doi: 10.1038/ncomms12037. PubMed PMID:  
428 27353360; PubMed Central PMCID: PMCPMC4931344.
- 429 16. Woodford MR, Dunn D, Miller JB, Jamal S, Neckers L, Mollapour M. Impact of  
430 Posttranslational Modifications on the Anticancer Activity of Hsp90 Inhibitors. *Adv Cancer Res.*  
431 2016;129:31-50. Epub 2016/02/27. doi: 10.1016/bs.acr.2015.09.002. PubMed PMID: 26916000.
- 432 17. Woodford MR, Truman AW, Dunn DM, Jensen SM, Cotran R, Bullard R, et al. Mps1  
433 Mediated Phosphorylation of Hsp90 Confers Renal Cell Carcinoma Sensitivity and Selectivity to  
434 Hsp90 Inhibitors. *Cell Rep.* 2016;14(4):872-84. Epub 2016/01/26. doi:  
435 10.1016/j.celrep.2015.12.084. PubMed PMID: 26804907; PubMed Central PMCID:  
436 PMCPMC4887101.
- 437 18. Dushukyan N, Dunn DM, Sager RA, Woodford MR, Loiselle DR, Daneshvar M, et al.  
438 Phosphorylation and Ubiquitination Regulate Protein Phosphatase 5 Activity and Its Prosurvival  
439 Role in Kidney Cancer. *Cell Rep.* 2017;21(7):1883-95. Epub 2017/11/16. doi:  
440 10.1016/j.celrep.2017.10.074. PubMed PMID: 29141220; PubMed Central PMCID:  
441 PMCPMC5699234.
- 442 19. Nitika, Truman AW. Endogenous epitope tagging of heat shock protein 70 isoform Hsc70  
443 using CRISPR/Cas9. *Cell Stress Chaperones.* 2018;23(3):347-55. Epub 2017/09/26. doi:  
444 10.1007/s12192-017-0845-2. PubMed PMID: 28944418; PubMed Central PMCID:  
445 PMCPMC5904078.
- 446 20. Parrales A, Ranjan A, Iyer SV, Padhye S, Weir SJ, Roy A, et al. DNAJA1 controls the fate  
447 of misfolded mutant p53 through the mevalonate pathway. *Nat Cell Biol.* 2016;18(11):1233-43.

- 448 Epub 2016/10/28. doi: 10.1038/ncb3427. PubMed PMID: 27775703; PubMed Central PMCID:  
449 PMCPMC5340314.
- 450 21. Stark JL, Mehla K, Chaika N, Acton TB, Xiao R, Singh PK, et al. Structure and function of  
451 human DnaJ homologue subfamily a member 1 (DNAJA1) and its relationship to pancreatic  
452 cancer. *Biochemistry*. 2014;53(8):1360-72. Epub 2014/02/12. doi: 10.1021/bi401329a. PubMed  
453 PMID: 24512202; PubMed Central PMCID: PMCPMC3985919.
- 454 22. Moses MA, Kim YS, Rivera-Marquez GM, Oshima N, Watson MJ, Beebe KE, et al.  
455 Targeting the Hsp40/Hsp70 Chaperone Axis as a Novel Strategy to Treat Castration-Resistant  
456 Prostate Cancer. *Cancer Res*. 2018;78(14):4022-35. Epub 2018/05/17. doi: 10.1158/0008-  
457 5472.CAN-17-3728. PubMed PMID: 29764864; PubMed Central PMCID: PMCPMC6050126.
- 458 23. O'Neil J, Benita Y, Feldman I, Chenard M, Roberts B, Liu Y, et al. An Unbiased Oncology  
459 Compound Screen to Identify Novel Combination Strategies. *Mol Cancer Ther*. 2016;15(6):1155-  
460 62. Epub 2016/03/18. doi: 10.1158/1535-7163.MCT-15-0843. PubMed PMID: 26983881.
- 461 24. Palmer AC, Sorger PK. Combination Cancer Therapy Can Confer Benefit via Patient-to-  
462 Patient Variability without Drug Additivity or Synergy. *Cell*. 2017;171(7):1678-91 e13. Epub  
463 2017/12/16. doi: 10.1016/j.cell.2017.11.009. PubMed PMID: 29245013; PubMed Central PMCID:  
464 PMCPMC5741091.
- 465 25. Ding KF, Petricoin EF, Finlay D, Yin H, Hendricks WPD, Sereduk C, et al. Nonlinear mixed  
466 effects dose response modeling in high throughput drug screens: application to melanoma cell  
467 line analysis. *Oncotarget*. 2018;9(4):5044-57. Epub 2018/02/13. doi: 10.18632/oncotarget.23495.  
468 PubMed PMID: 29435161; PubMed Central PMCID: PMCPMC5797032.
- 469 26. Koh SB, Wallez Y, Dunlop CR, Bernaldo de Quiros Fernandez S, Bapiro TE, Richards  
470 FM, et al. Mechanistic Distinctions between CHK1 and WEE1 Inhibition Guide the Scheduling of  
471 Triple Therapy with Gemcitabine. *Cancer Res*. 2018;78(11):3054-66. Epub 2018/05/08. doi:  
472 10.1158/0008-5472.CAN-17-3932. PubMed PMID: 29735549; PubMed Central PMCID:  
473 PMCPMC5985963.
- 474 27. Jones LH, Bunnage ME. Applications of chemogenomic library screening in drug  
475 discovery. *Nat Rev Drug Discov*. 2017;16(4):285-96. Epub 2017/01/21. doi:  
476 10.1038/nrd.2016.244. PubMed PMID: 28104905.
- 477 28. Chou TC. Theoretical basis, experimental design, and computerized simulation of  
478 synergism and antagonism in drug combination studies. *Pharmacol Rev*. 2006;58(3):621-81. doi:  
479 10.1124/pr.58.3.10. PubMed PMID: 16968952.
- 480 29. Wu J, Liu T, Rios Z, Mei Q, Lin X, Cao S. Heat Shock Proteins and Cancer. *Trends*  
481 *Pharmacol Sci*. 2017;38(3):226-56. Epub 2016/12/26. doi: 10.1016/j.tips.2016.11.009. PubMed  
482 PMID: 28012700.
- 483 30. Murphy ME. The HSP70 family and cancer. *Carcinogenesis*. 2013;34(6):1181-8. Epub  
484 2013/04/09. doi: 10.1093/carcin/bgt111. PubMed PMID: 23563090; PubMed Central PMCID:  
485 PMCPMC3670260.
- 486 31. Gao J, Aksoy BA, Dogrusoz U, Dresdner G, Gross B, Sumer SO, et al. Integrative analysis  
487 of complex cancer genomics and clinical profiles using the cBioPortal. *Sci Signal*.  
488 2013;6(269):p11. Epub 2013/04/04. doi: 10.1126/scisignal.2004088. PubMed PMID: 23550210;  
489 PubMed Central PMCID: PMCPMC4160307.
- 490 32. Cerami E, Gao J, Dogrusoz U, Gross BE, Sumer SO, Aksoy BA, et al. The cBio cancer  
491 genomics portal: an open platform for exploring multidimensional cancer genomics data. *Cancer*  
492 *Discov*. 2012;2(5):401-4. Epub 2012/05/17. doi: 10.1158/2159-8290.CD-12-0095. PubMed PMID:  
493 22588877; PubMed Central PMCID: PMCPMC3956037.
- 494 33. Wang CC, Liao YP, Mischel PS, Iwamoto KS, Cacalano NA, McBride WH. HDJ-2 as a  
495 target for radiosensitization of glioblastoma multiforme cells by the farnesyltransferase inhibitor  
496 R115777 and the role of the p53/p21 pathway. *Cancer Res*. 2006;66(13):6756-62. Epub  
497 2006/07/05. doi: 10.1158/0008-5472.CAN-06-0185. PubMed PMID: 16818651.

- 498 34. Wong CC, Cheng KW, Rigas B. Preclinical predictors of anticancer drug efficacy: critical  
499 assessment with emphasis on whether nanomolar potency should be required of candidate  
500 agents. *J Pharmacol Exp Ther.* 2012;341(3):572-8. Epub 2012/03/27. doi:  
501 10.1124/jpet.112.191957. PubMed PMID: 22448039; PubMed Central PMCID:  
502 PMCPMC3362883.
- 503 35. Wisen S, Bertelsen EB, Thompson AD, Patury S, Ung P, Chang L, et al. Binding of a small  
504 molecule at a protein-protein interface regulates the chaperone activity of hsp70-hsp40. *ACS*  
505 *Chem Biol.* 2010;5(6):611-22. Epub 2010/05/21. doi: 10.1021/cb1000422. PubMed PMID:  
506 20481474; PubMed Central PMCID: PMCPMC2950966.
- 507 36. Wisitpitthaya S, Zhao Y, Long MJ, Li M, Fletcher EA, Blessing WA, et al. Cladribine and  
508 Fludarabine Nucleotides Induce Distinct Hexamers Defining a Common Mode of Reversible RNR  
509 Inhibition. *ACS Chem Biol.* 2016;11(7):2021-32. Epub 2016/05/10. doi:  
510 10.1021/acscchembio.6b00303. PubMed PMID: 27159113; PubMed Central PMCID:  
511 PMCPMC4946967.
- 512 37. Xiang Q, Chen W, Ren M, Wang J, Zhang H, Deng DY, et al. Cabozantinib suppresses  
513 tumor growth and metastasis in hepatocellular carcinoma by a dual blockade of VEGFR2 and  
514 MET. *Clin Cancer Res.* 2014;20(11):2959-70. Epub 2014/04/05. doi: 10.1158/1078-0432.CCR-  
515 13-2620. PubMed PMID: 24700742.
- 516 38. Augustin A, Lamerz J, Meistermann H, Golling S, Scheiblich S, Hermann JC, et al.  
517 Quantitative chemical proteomics profiling differentiates erlotinib from gefitinib in EGFR wild-type  
518 non-small cell lung carcinoma cell lines. *Mol Cancer Ther.* 2013;12(4):520-9. Epub 2013/02/02.  
519 doi: 10.1158/1535-7163.MCT-12-0880. PubMed PMID: 23371860.
- 520 39. Wu CC, Li TK, Farh L, Lin LY, Lin TS, Yu YJ, et al. Structural basis of type II topoisomerase  
521 inhibition by the anticancer drug etoposide. *Science.* 2011;333(6041):459-62. Epub 2011/07/23.  
522 doi: 10.1126/science.1204117. PubMed PMID: 21778401.
- 523 40. Senra JM, Telfer BA, Cherry KE, McCrudden CM, Hirst DG, O'Connor MJ, et al. Inhibition  
524 of PARP-1 by olaparib (AZD2281) increases the radiosensitivity of a lung tumor xenograft. *Mol*  
525 *Cancer Ther.* 2011;10(10):1949-58. Epub 2011/10/06. doi: 10.1158/1535-7163.MCT-11-0278.  
526 PubMed PMID: 21825006; PubMed Central PMCID: PMCPMC3192032.
- 527 41. Dudgeon C, Peng R, Wang P, Sebastiani A, Yu J, Zhang L. Inhibiting oncogenic signaling  
528 by sorafenib activates PUMA via GSK3beta and NF-kappaB to suppress tumor cell growth.  
529 *Oncogene.* 2012;31(46):4848-58. Epub 2012/01/31. doi: 10.1038/onc.2011.644. PubMed PMID:  
530 22286758; PubMed Central PMCID: PMCPMC3342476.
- 531 42. Gandhi V, Plunkett W, Cortes JE. Omacetaxine: a protein translation inhibitor for treatment  
532 of chronic myelogenous leukemia. *Clin Cancer Res.* 2014;20(7):1735-40. Epub 2014/02/07. doi:  
533 10.1158/1078-0432.CCR-13-1283. PubMed PMID: 24501394; PubMed Central PMCID:  
534 PMCPMC4048124.
- 535 43. Hevener K, Verstak TA, Lutat KE, Riggsbee DL, Mooney JW. Recent developments in  
536 topoisomerase-targeted cancer chemotherapy. *Acta Pharm Sin B.* 2018;8(6):844-61. Epub  
537 2018/12/07. doi: 10.1016/j.apsb.2018.07.008. PubMed PMID: 30505655; PubMed Central  
538 PMCID: PMCPMC6251812.
- 539 44. Chou TC. Drug combination studies and their synergy quantification using the Chou-  
540 Talalay method. *Cancer Res.* 2010;70(2):440-6. Epub 2010/01/14. doi: 10.1158/0008-5472.CAN-  
541 09-1947. PubMed PMID: 20068163.
- 542 45. Vlachogiannis G, Hedayat S, Vatsiou A, Jamin Y, Fernandez-Mateos J, Khan K, et al.  
543 Patient-derived organoids model treatment response of metastatic gastrointestinal cancers.  
544 *Science.* 2018;359(6378):920-6. Epub 2018/02/24. doi: 10.1126/science.aa02774. PubMed  
545 PMID: 29472484; PubMed Central PMCID: PMCPMC6112415.
- 546 46. Prasad V, Fojo T, Brada M. Precision oncology: origins, optimism, and potential. *Lancet*  
547 *Oncol.* 2016;17(2):e81-e6. Epub 2016/02/13. doi: 10.1016/S1470-2045(15)00620-8. PubMed  
548 PMID: 26868357.



- 549 47. Nyga A, Cheema U, Loizidou M. 3D tumour models: novel in vitro approaches to cancer  
550 studies. *J Cell Commun Signal*. 2011;5(3):239-48. Epub 2011/04/19. doi: 10.1007/s12079-011-  
551 0132-4. PubMed PMID: 21499821; PubMed Central PMCID: PMCPMC3145874.
- 552 48. Pickl M, Ries CH. Comparison of 3D and 2D tumor models reveals enhanced HER2  
553 activation in 3D associated with an increased response to trastuzumab. *Oncogene*.  
554 2009;28(3):461-8. Epub 2008/11/04. doi: 10.1038/onc.2008.394. PubMed PMID: 18978815.
- 555 49. Sottile ML, Nadin SB. Heat shock proteins and DNA repair mechanisms: an updated  
556 overview. *Cell Stress Chaperones*. 2018;23(3):303-15. Epub 2017/09/28. doi: 10.1007/s12192-  
557 017-0843-4. PubMed PMID: 28952019; PubMed Central PMCID: PMCPMC5904076.
- 558 50. Knighton LE, Delgado LE, Truman AW. Novel insights into molecular chaperone  
559 regulation of ribonucleotide reductase. *Curr Genet*. 2019;65(2):477-82. Epub 2018/12/07. doi:  
560 10.1007/s00294-018-0916-7. PubMed PMID: 30519713; PubMed Central PMCID:  
561 PMCPMC6421096.
- 562 51. Dubrez L, Causse S, Borges Bonan N, Dumetier B, Garrido C. Heat-shock proteins:  
563 chaperoning DNA repair. *Oncogene*. 2019. Epub 2019/09/22. doi: 10.1038/s41388-019-1016-y.  
564 PubMed PMID: 31541194.
- 565 52. Truman AW, Kristjansdottir K, Wolfgeher D, Ricco N, Mayampurath A, Volchenboum SL,  
566 et al. Quantitative proteomics of the yeast Hsp70/Hsp90 interactomes during DNA damage reveal  
567 chaperone-dependent regulation of ribonucleotide reductase. *Journal of proteomics*.  
568 2015;112:285-300. Epub 2014/12/03. doi: 10.1016/j.jprot.2014.09.028. PubMed PMID:  
569 25452130; PubMed Central PMCID: PMCPMC4485990.
- 570 53. Longley DB, Harkin DP, Johnston PG. 5-fluorouracil: mechanisms of action and clinical  
571 strategies. *Nat Rev Cancer*. 2003;3(5):330-8. Epub 2003/05/02. doi: 10.1038/nrc1074. PubMed  
572 PMID: 12724731.
- 573 54. Huguet F, Leguay T, Raffoux E, Rousselot P, Vey N, Pigneux A, et al. Clofarabine for the  
574 treatment of adult acute lymphoid leukemia: the Group for Research on Adult Acute  
575 Lymphoblastic Leukemia intergroup. *Leuk Lymphoma*. 2015;56(4):847-57. Epub 2014/07/06. doi:  
576 10.3109/10428194.2014.887708. PubMed PMID: 24996442.
- 577 55. Deng S, Yan T, Jendry C, Nemecek A, Vincetic M, Godtel-Armbrust U, et al.  
578 Dexrazoxane may prevent doxorubicin-induced DNA damage via depleting both topoisomerase  
579 II isoforms. *BMC Cancer*. 2014;14:842. Epub 2014/11/20. doi: 10.1186/1471-2407-14-842.  
580 PubMed PMID: 25406834; PubMed Central PMCID: PMCPMC4242484.
- 581 56. Gillies AT, Taylor R, Gestwicki JE. Synthetic lethal interactions in yeast reveal functional  
582 roles of J protein co-chaperones. *Mol Biosyst*. 2012;8(11):2901-8. Epub 2012/08/02. doi:  
583 10.1039/c2mb25248a. PubMed PMID: 22851130; PubMed Central PMCID: PMCPMC3463740.
- 584 57. Tang Y, Ramakrishnan C, Thomas J, DeFranco DB. A role for HDJ-2/HSDJ in correcting  
585 subnuclear trafficking, transactivation, and transrepression defects of a glucocorticoid receptor  
586 zinc finger mutant. *Mol Biol Cell*. 1997;8(5):795-809. Epub 1997/05/01. PubMed PMID: 9168467;  
587 PubMed Central PMCID: PMCPMC276130.
- 588 58. Grulich C. Cabozantinib: a MET, RET, and VEGFR2 tyrosine kinase inhibitor. *Recent*  
589 *Results Cancer Res*. 2014;201:207-14. Epub 2014/04/24. doi: 10.1007/978-3-642-54490-3\_12.  
590 PubMed PMID: 24756794.
- 591 59. Lin A, Giuliano CJ, Palladino A, John KM, Abramowicz C, Yuan ML, et al. Off-target toxicity  
592 is a common mechanism of action of cancer drugs undergoing clinical trials. *Sci Transl Med*.  
593 2019;11(509). Epub 2019/09/13. doi: 10.1126/scitranslmed.aaw8412. PubMed PMID: 31511426.
- 594 60. Oka M, Nakai M, Endo T, Lim CR, Kimata Y, Kohno K. Loss of Hsp70-Hsp40 chaperone  
595 activity causes abnormal nuclear distribution and aberrant microtubule formation in M-phase of  
596 *Saccharomyces cerevisiae*. *J Biol Chem*. 1998;273(45):29727-37. Epub 1998/10/29. doi:  
597 10.1074/jbc.273.45.29727. PubMed PMID: 9792686.
- 598 61. Silflow CD, Sun X, Haas NA, Foley JW, Lefebvre PA. The Hsp70 and Hsp40 chaperones  
599 influence microtubule stability in *Chlamydomonas*. *Genetics*. 2011;189(4):1249-60. Epub

- 2011/09/24. doi: 10.1534/genetics.111.133587. PubMed PMID: 21940683; PubMed Central  
PMCID: PMCPMC3241413.
62. Meshalkina DA, Shevtsov MA, Dobrodumov AV, Komarova EY, Voronkina IV, Lazarev  
VF, et al. Knock-down of Hdj2/DNAJA1 co-chaperone results in an unexpected burst of  
tumorigenicity of C6 glioblastoma cells. *Oncotarget*. 2016;7(16):22050-63. Epub 2016/03/10. doi:  
10.18632/oncotarget.7872. PubMed PMID: 26959111; PubMed Central PMCID:  
PMCPMC5008343.
63. Cobham MV, Donovan D. Ixabepilone: a new treatment option for the management of  
taxane-resistant metastatic breast cancer. *Cancer Manag Res*. 2009;1:69-77. Epub 2009/01/01.  
PubMed PMID: 21188125; PubMed Central PMCID: PMCPMC3004658.
64. Li QQ, Hao JJ, Zhang Z, Krane LS, Hammerich KH, Sanford T, et al. Proteomic analysis  
of proteome and histone post-translational modifications in heat shock protein 90 inhibition-  
mediated bladder cancer therapeutics. *Sci Rep*. 2017;7(1):201. Epub 2017/03/17. doi:  
10.1038/s41598-017-00143-6. PubMed PMID: 28298630; PubMed Central PMCID:  
PMCPMC5427839.
65. Mettananda S, Yasara N, Fisher CA, Taylor S, Gibbons R, Higgs D. Synergistic silencing  
of alpha-globin and induction of gamma-globin by histone deacetylase inhibitor, vorinostat as a  
potential therapy for beta-thalassaemia. *Sci Rep*. 2019;9(1):11649. Epub 2019/08/14. doi:  
10.1038/s41598-019-48204-2. PubMed PMID: 31406232; PubMed Central PMCID:  
PMCPMC6690964.
66. Eckschlager T, Plich J, Stiborova M, Hrabeta J. Histone Deacetylase Inhibitors as  
Anticancer Drugs. *Int J Mol Sci*. 2017;18(7). Epub 2017/07/04. doi: 10.3390/ijms18071414.  
PubMed PMID: 28671573; PubMed Central PMCID: PMCPMC5535906.
67. Bewersdorf JP, Shallis R, Stahl M, Zeidan AM. Epigenetic therapy combinations in acute  
myeloid leukemia: what are the options? *Ther Adv Hematol*. 2019;10:2040620718816698. Epub  
2019/02/06. doi: 10.1177/2040620718816698. PubMed PMID: 30719265; PubMed Central  
PMCID: PMCPMC6348528.
68. Johnson N, Shapiro GI. Cyclin-dependent kinases (cdks) and the DNA damage response:  
rationale for cdk inhibitor-chemotherapy combinations as an anticancer strategy for solid tumors.  
*Expert Opin Ther Targets*. 2010;14(11):1199-212. Epub 2010/10/12. doi:  
10.1517/14728222.2010.525221. PubMed PMID: 20932174; PubMed Central PMCID:  
PMCPMC3957489.
69. Karakashev S, Zhu H, Yokoyama Y, Zhao B, Fatkhutdinov N, Kossenkov AV, et al. BET  
Bromodomain Inhibition Synergizes with PARP Inhibitor in Epithelial Ovarian Cancer. *Cell Rep*.  
2017;21(12):3398-405. Epub 2017/12/21. doi: 10.1016/j.celrep.2017.11.095. PubMed PMID:  
29262321; PubMed Central PMCID: PMCPMC5745042.

637

## 638 **Figure legends.**

639 **Figure 1. HDJ2 is altered in cancer.** (A) Prevalence of HDJ2 alterations in various  
640 cancer genomes analyzed via the cBioPortal. Red bar, amplification. Blue bar,  
641 homozygous deletion. Green square, missense mutation. Purple square, Fusion. (B)

642 HDJ2 mRNA expression in tumor determined via cBioPortal. P-value for a gene  
643 represents its P-value for the median-ranked analysis.

644

645 **Figure 2. Sensitivity of WT and HDJ2 knockout cells to the NIH Approved Oncology**

646 **Collection.** (A) Workflow of high-throughput cell-based screen. (B) A collection of 132

647 drugs were screened at 50 $\mu$ mol/L with Wild-type and HDJ2 KO cells. Results are the

648 average of at least triplicates and error is SEM. The dotted lines represent an interaction

649 change of up or down two-fold. The dotted lines represent an interaction change of

650  $\text{Log}_2 > 1.5$  or  $\text{Log}_2 < -1.5$ . The effect of drug combination are colored according to

651 significant upregulation and downregulation: red (synergistic), green (antagonistic) or

652 black (no significant change). C) & D) Drug ontology of synergistic and antagonistic hits

653 based on the pathways affected by the approved oncology drugs in the screen.

654

655 **Figure 3. Drug interaction between 116-9e (HDJ2 inhibitor) and selected hits.**

656 LNCaP cells were treated with different concentration of Cabozantinib, Clofarabine,

657 Vinblastine, Idarubicin, Omacetaxine and Sorafenib with or without 116-9e for 72 hours

658 in RPMI-1640 medium containing 10% FBS. Each point is the mean  $\pm$  SD for three

659 independent experiments. Growth inhibition was determined using Cell Titer-Glo assay.

660 Combination Index (CI, measure of drug synergy) was determined using Chou-Talalay

661 method via Compusyn software. CI values of  $< 1$  indicate drug synergy.

662

663 **Figure 4. Effect of combination treatments on prostate cancer spheroids.**

664 A. Cells were plated on Matrigel coated 24 well plates. Six drugs (Cabozantinib,

665 Clofarabine, Vinblastine, Idarubicin, Omacetaxine and Sorafenib) were tested in  
666 triplicates for prostate cancer spheroids. The pictures are representative images as  
667 acquired using EVOS cell imager. B. Proliferation of spheroids treated with Cabozantinib  
668 (CBZ), Clofarabine (CFB), Vinblastine (VBT), Idarubicin (IRB), Omacetaxine (OAT) and  
669 Sorafenib (SRN) measured using AnnexinV/PI staining.

670

### 671 **Graphical Abstract**

672 HDJ2 knockout or inhibition via small molecule impacts cellular resistance to anticancer  
673 therapeutics.

674

### 675 **Supplementary Data**

676

677 Supplementary Table 1. Hits identified in combination screen with simultaneous  
678 treatment of Approved oncology drugs with HDJ2 Knockout HAP1 cell lines.

679

680

681

682

683

684

685

686

687

688



# Prostate Cancer

116-9e

Hdj2 KO

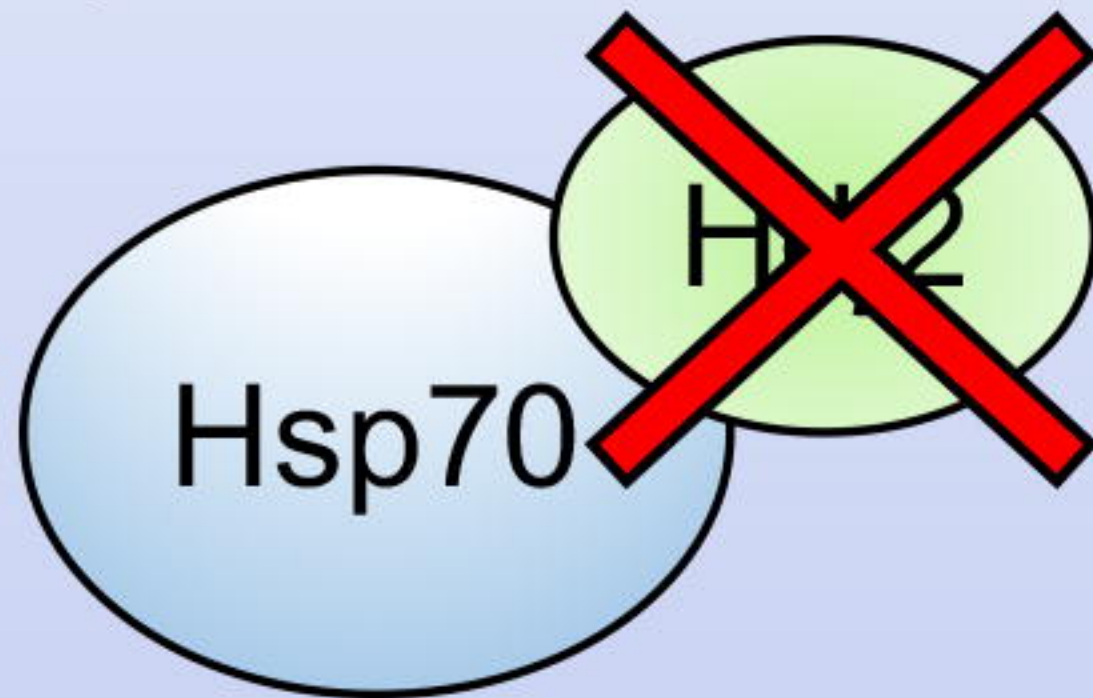

OR

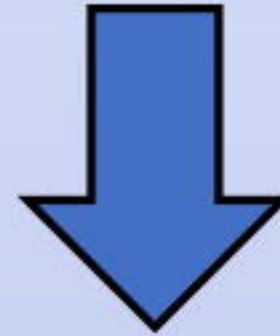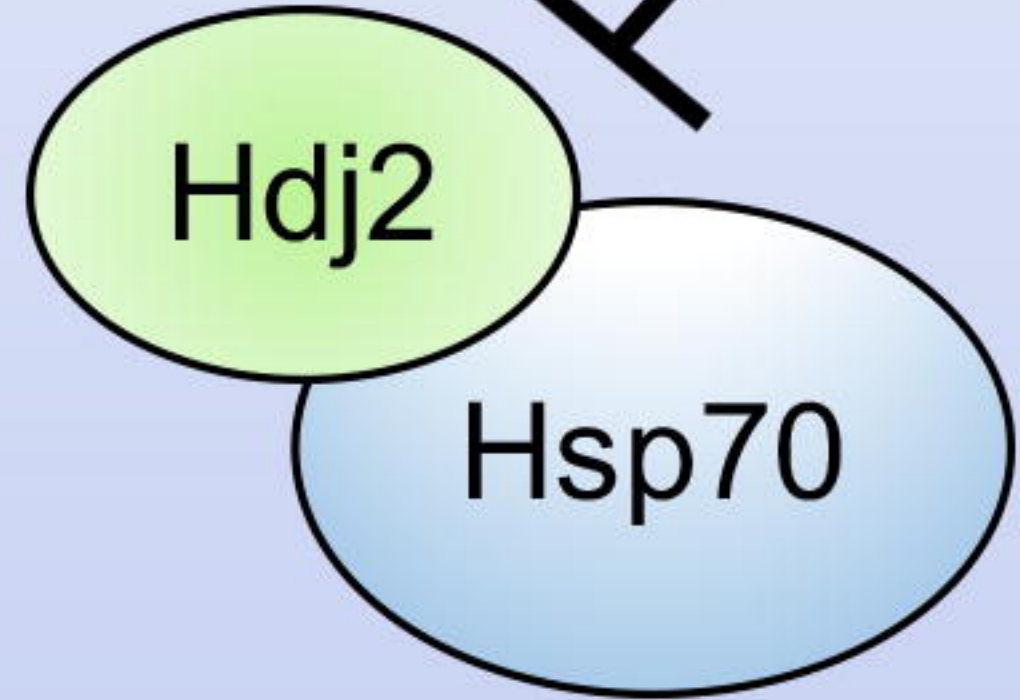

bioRxiv preprint doi: <https://doi.org/10.1101/818427>; this version posted October 28, 2019. The copyright holder for this preprint (which was not certified by peer review) is the author/funder. All rights reserved. No reuse allowed without permission.

Increased Sensitivity to:

Decreased Sensitivity to:

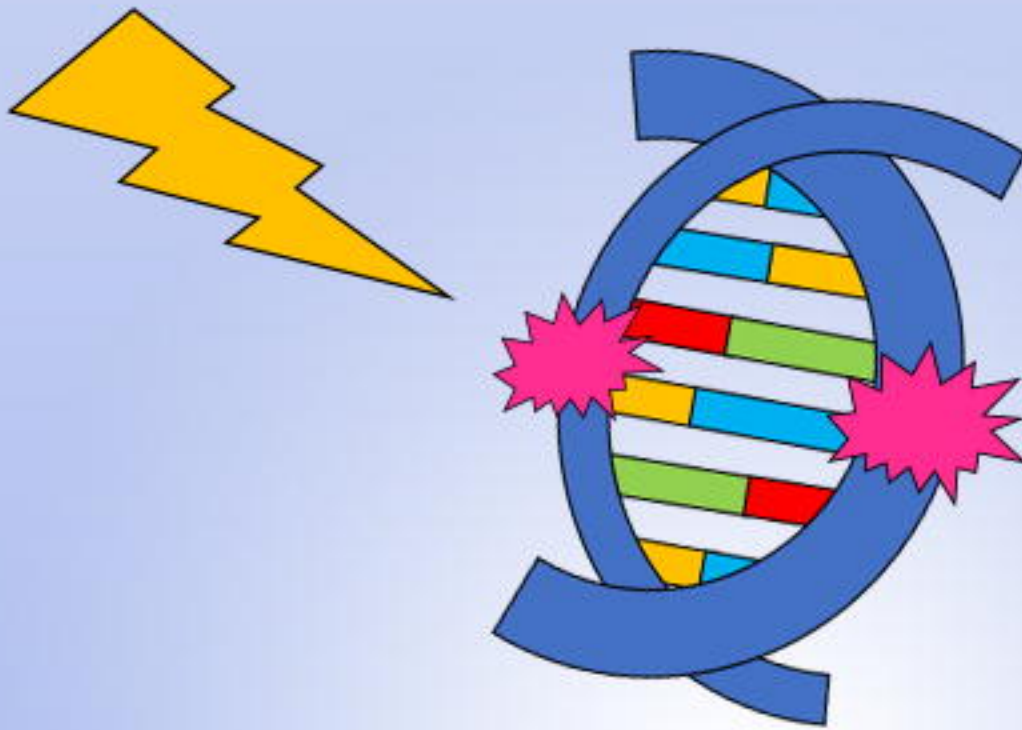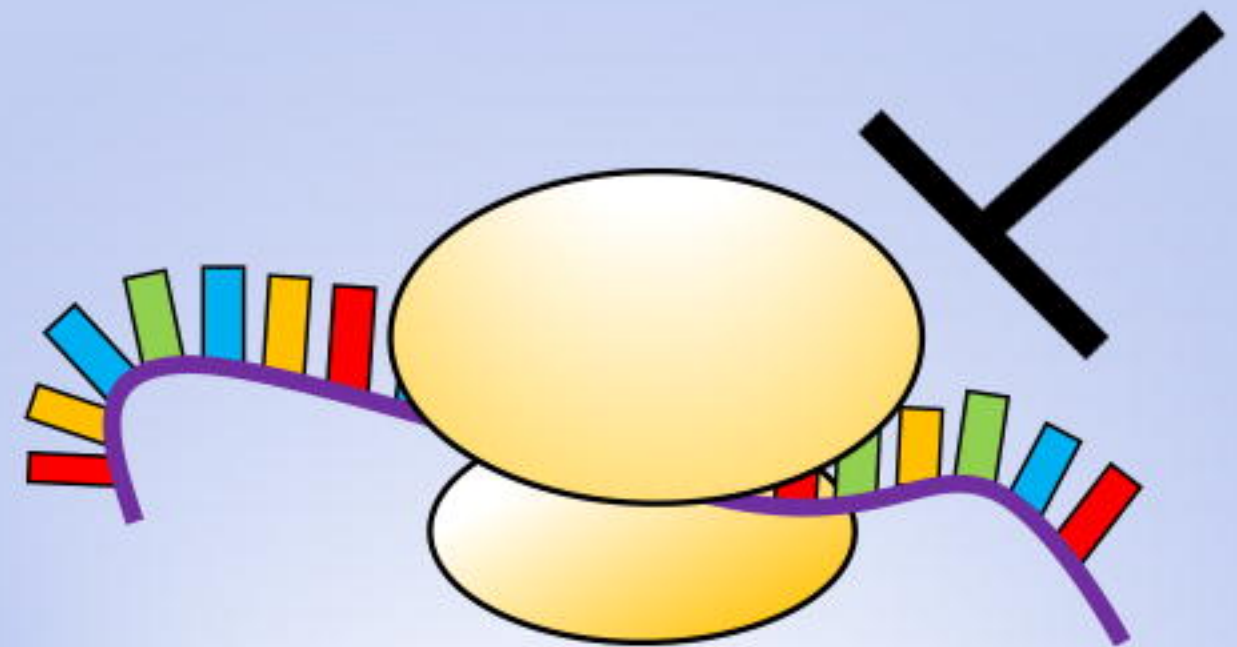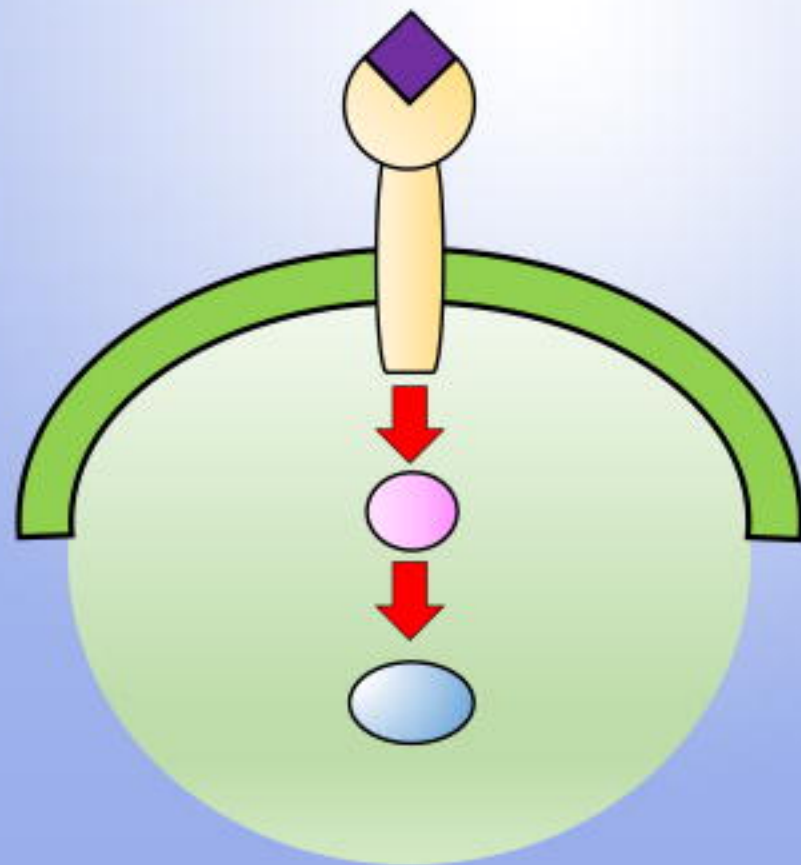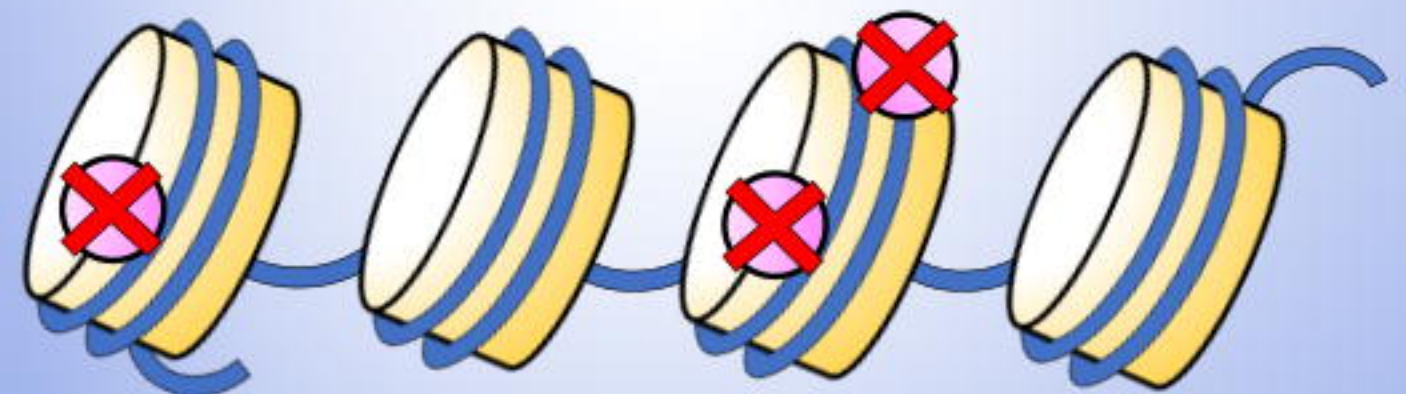



# Figure 2.

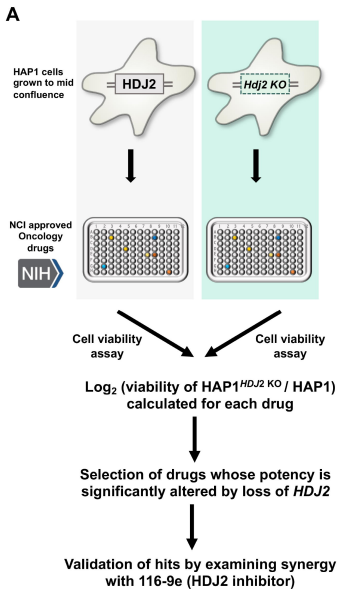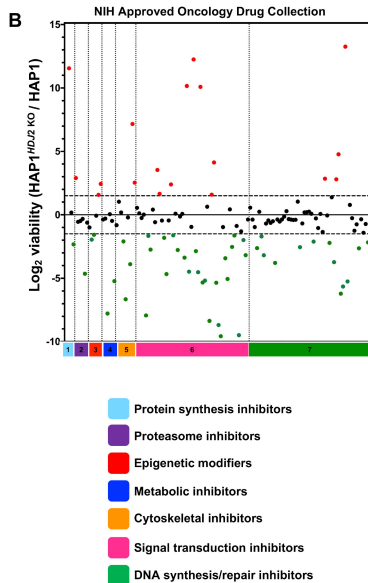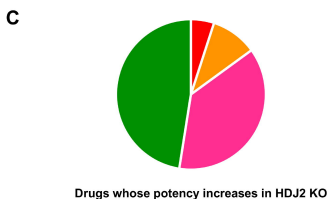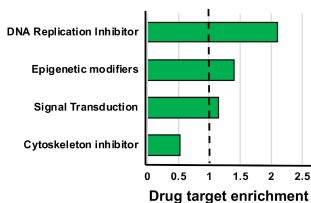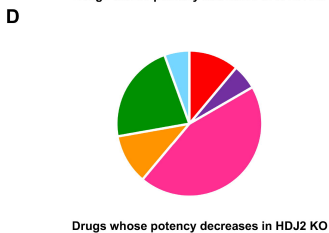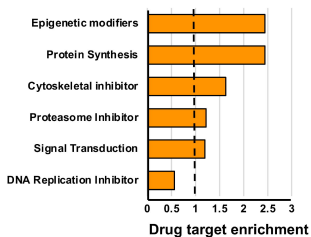



Figure 3.

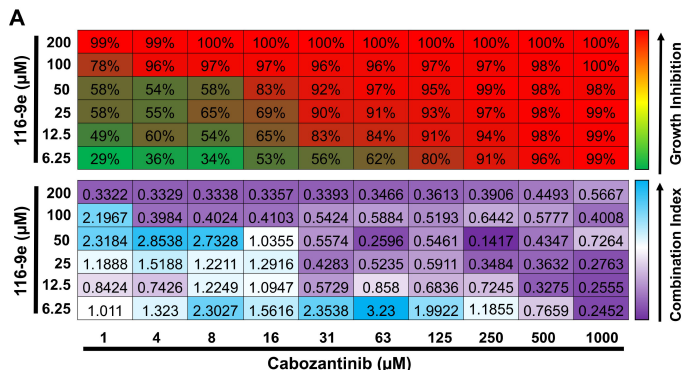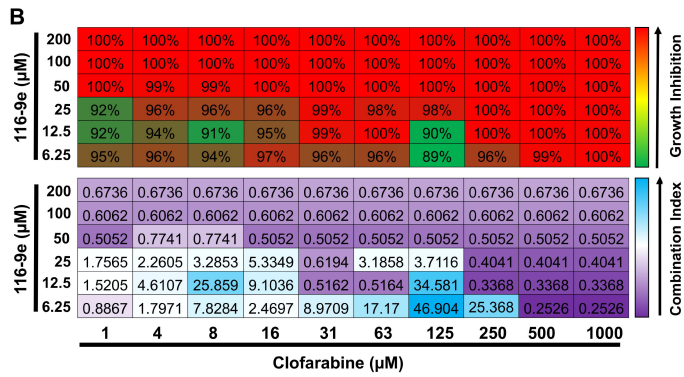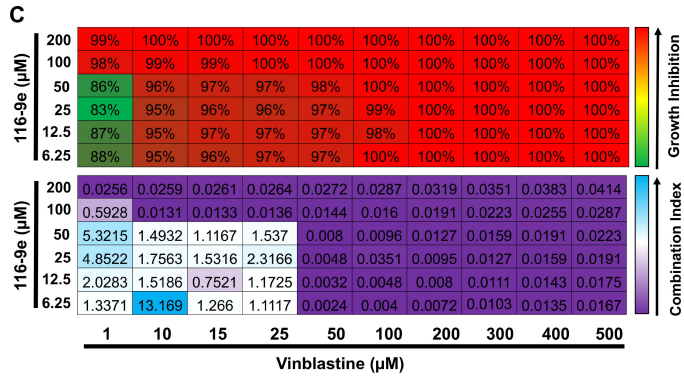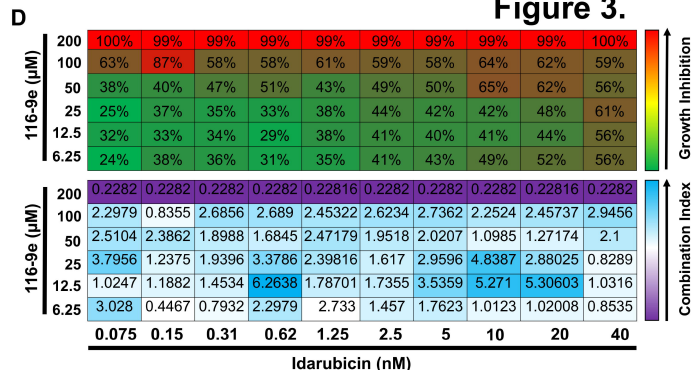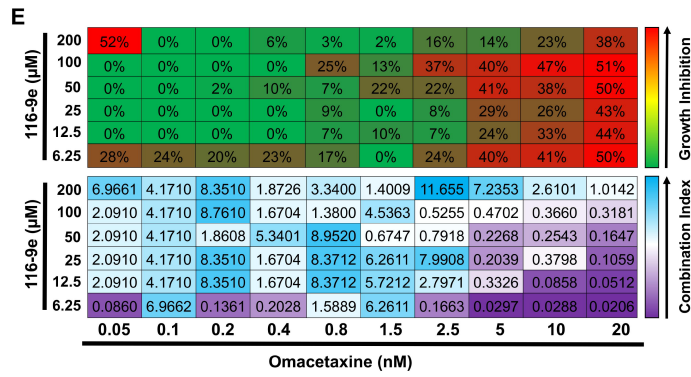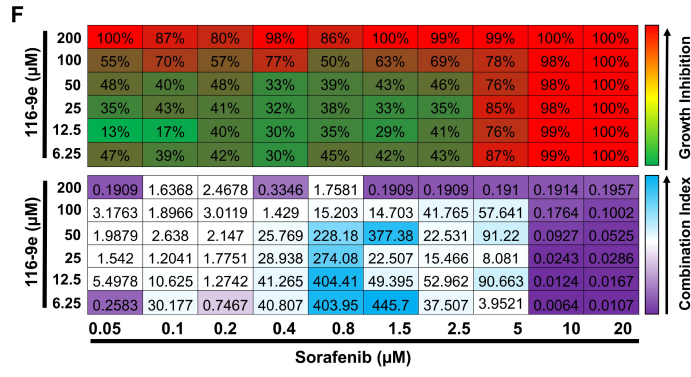

Figure 4.

A

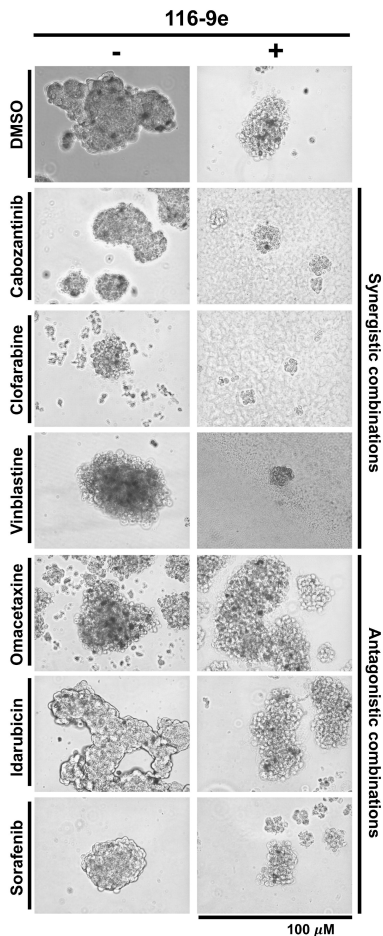

B

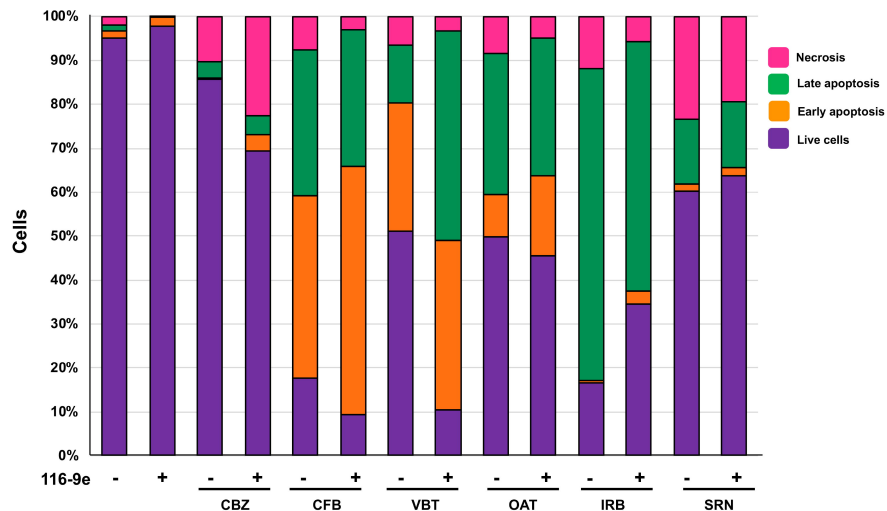

Source: https://www.biorxiv.org/content/10.1101/818427v1.full.pdf
